## MAGI-MS: Multiple seed-centric module discovery

### Authors and affiliations

Julie C. Chow,<sup>1\*</sup> Ryan Zhou<sup>2</sup>, Fereydoon Hormozdiari<sup>3\*</sup>

<sup>1</sup>UC Davis Genome Center, University of California, Davis, Davis, CA 95616, USA

<sup>2</sup>Department of Computer Science and Engineering, University of California, Merced, Merced, CA 95343, USA

<sup>3</sup>UC Davis Genome Center, University of California, Davis, Davis, CA 95616, USA; MIND Institute, University of California, Davis, 95817 USA; Biochemistry and Molecular Medicine, University of California, Davis, 95616 USA

\*Correspondence: [jchow@ucdavis.edu](mailto:jchow@ucdavis.edu), [fhormozd@ucdavis.edu](mailto:fhormozd@ucdavis.edu)

### Abstract

Complex disorders manifest by the interaction of multiple genetic and environmental factors. Through the construction of genetic modules that consist of highly co-expressed genes, it is possible to identify genes that participate in common biological pathways relevant to specific phenotypes. We have previously developed tools MAGI and MAGI-S for genetic module discovery by incorporating co-expression and protein-interaction networks. Here we introduce an extension to MAGI-S, denoted as Merging Affected Genes into Integrated Networks - Multiple Seeds (MAGI-MS), that permits the user to further specify a disease pathway of interest by selecting multiple seed genes likely to function in the same molecular mechanism. By providing MAGI-MS with pairs of seed genes involved in processes underlying certain classes of neurodevelopmental disorders, such as epilepsy, we demonstrate that MAGI-MS can reveal modules enriched in genes relevant to chemical synaptic transmission, glutamatergic synapse, and other functions associated with the provided seed genes.

### Availability and implementation

MAGI-MS is free and is available at: <https://github.com/jchow32/MAGI-MS>

### Introduction

The extensive genetic and phenotypic heterogeneity characteristic of complex disorders indicates that the interaction of multiple genes underlie etiology (Parenti *et al.*, 2020). The development of protein-protein interaction and co-expression networks has aided in identification of networks of genes hypothesized to belong to the same functional module and contribute to specific pathways (Parikshak *et al.*, 2015; Chen *et al.*, 2020).

Previously, we described a method called MAGI-S used to dissect complex phenotypes, such as epilepsy, by producing modules seeded from a single gene associated with the phenotype of interest (Chow *et al.*, 2019). We demonstrated that independently providing MAGI-S single seed neurodevelopmental disorder (NDD) genes with varying degrees of association with epilepsy revealed modules enriched in 1) non-synonymous coding *de novo* variation in affected NDD cases relative to controls, 2) genes associated with epilepsy, and 3) *de novo* mutation specifically retrieved from epilepsy cohorts, suggesting that MAGI-S can uncover networks of genes relevant to a complex disorder.

We introduce an extension to the existing method MAGI-S (Chow *et al.*, 2019), referred to as MAGI-Multiple Seeds (MAGI-MS). MAGI-MS permits the user to select up to three seed genes from which to construct modules, using either the average or minimum co-expression of other genes relative to the selected seeds during gene score assignment. In addition, we have

simplified the process of running the compiled MAGI-MS program by providing example commands, sample input files, and suggested parameter combinations for ease of use.

## Materials and methods

MAGI-MS uses a protein-protein interaction (PPI) network, co-expression network, deleterious mutations within a control population, and seed gene(s) to create genetic modules that satisfy constraints related to PPI connectivity and degree of co-expression amongst module genes (**Supplementary Data**). In the following experiments, we use PPIs retrieved from the HPRD and the STRING databases (Keshava Prasad *et al.*, 2009; Szklarczyk *et al.*, 2011), RNA-seq data from the BrainSpan: Atlas of the Developing Human Brain as the co-expression network (Miller *et al.*, 2014), and control variants from the NHLBI Exome Sequencing Project (ESP) (<http://evs.gs.washington.edu/EVS/>). Briefly, MAGI-MS assigns a score (**Equation 1**) to every gene within the PPI network (**Figure 1**). High-scoring seed pathways are created by the use of a modified color coding algorithm to find simple paths that maximize the summation of scores associated with genes (Hormozdiari *et al.*, 2015). Seed pathways are then merged into clusters by a random walk, and clusters are improved incrementally by local search to yield top scoring modules.

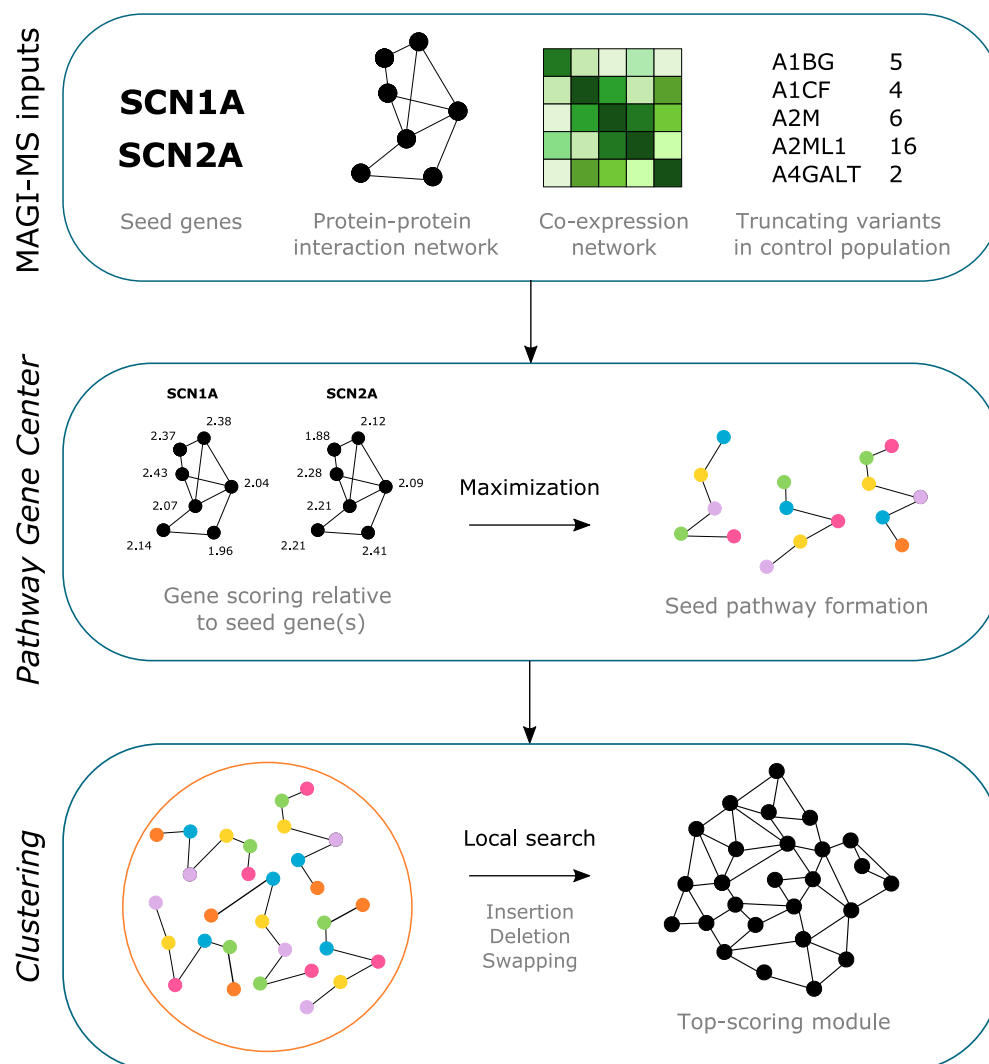

**Figure 1.** General methods overview of MAGI-MS. User-selected seed gene(s), a protein-protein interaction (PPI) network, a co-expression network, and loss-of-function mutations observed in a control population are provided as input to construct modules specific to biological pathways associated with the provided seed genes. During *Pathway Gene Center*, scores are assigned to genes to describe their degree of co-expression with seed gene(s), and seed pathways consisting of high scoring genes are formed. During *Clustering*, seed pathways are merged and refined to produce candidate modules.

To assess the ability of MAGI-MS to dissect a complex phenotype, we provided MAGI-MS with 6 pairs of seed genes, where each pair consists of genes observed to participate in a similar biological function (Szklarczyk *et al.*, 2021) (CHD8-CREBBP, CHD8-CTNNB1, GABRA3-GABRB1, GRIN2A-GRIN2B, SHANK2-SHANK3, SCN1A-SCN2A): We additionally provided MAGI-MS with a seed gene pair that are not hypothesized to participate in the same pathways (SCN1A-CTNNB1). To confirm the presence of relevant functional enrichment and cell-type specific expression, modules were provided to the tools Enrichr and Cell-type Specific Expression Analysis (CSEA) (Kuleshov *et al.*, 2016; Xu *et al.*, 2014).

## Results

Given pairs of seed genes involved in the same biological pathway, MAGI-MS produces modules that have significant overlap with modules seeded from either seed gene alone (**Supplementary Table 1**). On average, 49.5% and 61.4% of the genes in paired modules exist, using either minimum or average co-expression values during gene score assignment, respectively, in either of the singly-seeded modules.

Modules with paired seeds related to the epilepsy phenotype (GABRA3-GABRB1, GRIN2A-GRIN2B, and SCN1A-SCN2A) were enriched in terms such as long-term potentiation, chemical synaptic transmission, among others, and showed selective expression in deep cortical neurons (**Supplementary Table 1**). For seed gene pairs related to more general NDD and autism phenotypes (CHD8-CREBBP and CHD8-CTNNB1), we observe an enrichment in chromatin organization and regulation of transcription. For the module constructed with seed genes that do not participate in the same biological function (SCN1A-CTNNB1), a module was not formed due to low scoring seed pathways, indicating that the choice of multiple seed genes from pathways with similar biological function is critical to form a module that is useful for the dissection of a specific phenotype.

## Conclusion

We present an extension to the existing method MAGI-S, denoted as MAGI-MS, which permits the discovery of genetic modules specific to certain biological functions by selection of multiple seed genes involved in a pathway of interest. MAGI-MS is freely available with updated user guides for parameter and input choices.

## Funding

This work was supported partly by NSF award DBI-2042518 to F.H.

## References

Chen, S. *et al.* (2020) De novo missense variants disrupting protein-protein interactions affect risk for autism through gene co-expression and protein networks in neuronal cell types.

- Mol. Autism*, **11**, 76.
- Chow,J. *et al.* (2019) Dissecting the genetic basis of comorbid epilepsy phenotypes in neurodevelopmental disorders. *Genome Med.*, **11**, 65.
- Hormozdiari,F. *et al.* (2015) The discovery of integrated gene networks for autism and related disorders. *Genome Res.*, **25**, 142–154.
- Keshava Prasad,T.S. *et al.* (2009) Human Protein Reference Database—2009 update. *Nucleic Acids Res.*, **37**, D767–D772.
- Kuleshov,M.V. *et al.* (2016) Enrichr: a comprehensive gene set enrichment analysis web server 2016 update. *Nucleic Acids Res.*, **44**, W90–W97.
- Miller,J.A. *et al.* (2014) Transcriptional landscape of the prenatal human brain. *Nature*, **508**, 199–206.
- Parenti,I. *et al.* (2020) Neurodevelopmental Disorders: From Genetics to Functional Pathways. *Trends Neurosci.*, **43**, 608–621.
- Parikshak,N.N. *et al.* (2015) Systems biology and gene networks in neurodevelopmental and neurodegenerative disorders. *Nat. Rev. Genet.*, **16**, 441–458.
- Szklarczyk,D. *et al.* (2011) The STRING database in 2011: functional interaction networks of proteins, globally integrated and scored. *Nucleic Acids Res.*, **39**, D561–D568.
- Szklarczyk,D. *et al.* (2021) The STRING database in 2021: customizable protein-protein networks, and functional characterization of user-uploaded gene/measurement sets. *Nucleic Acids Res.*, **49**, D605–D612.
- Xu,X. *et al.* (2014) Cell Type-Specific Expression Analysis to Identify Putative Cellular Mechanisms for Neurogenetic Disorders. *J. Neurosci.*, **34**, 1420–1431.

### Supplementary data

SupplementaryTable1 - .xlsx file

SupplementaryData - .PDF file
